# Supplementary material
Source: publisher figshare collection journal article supplement (https://tandf.figshare.com/articles/dataset/_/5705203)

**Figure S3. Unrooted haplotype nuclear networks.** 1) *c-mos*; 2) *MC1R*. Colours correspond to the five lineages identified (see Fig. 1.1 and 1.3). Circle sizes are proportional to the number of individuals and empty circles represent mutational steps. Detailed information on the samples included in the network analysis is given in Table S1.

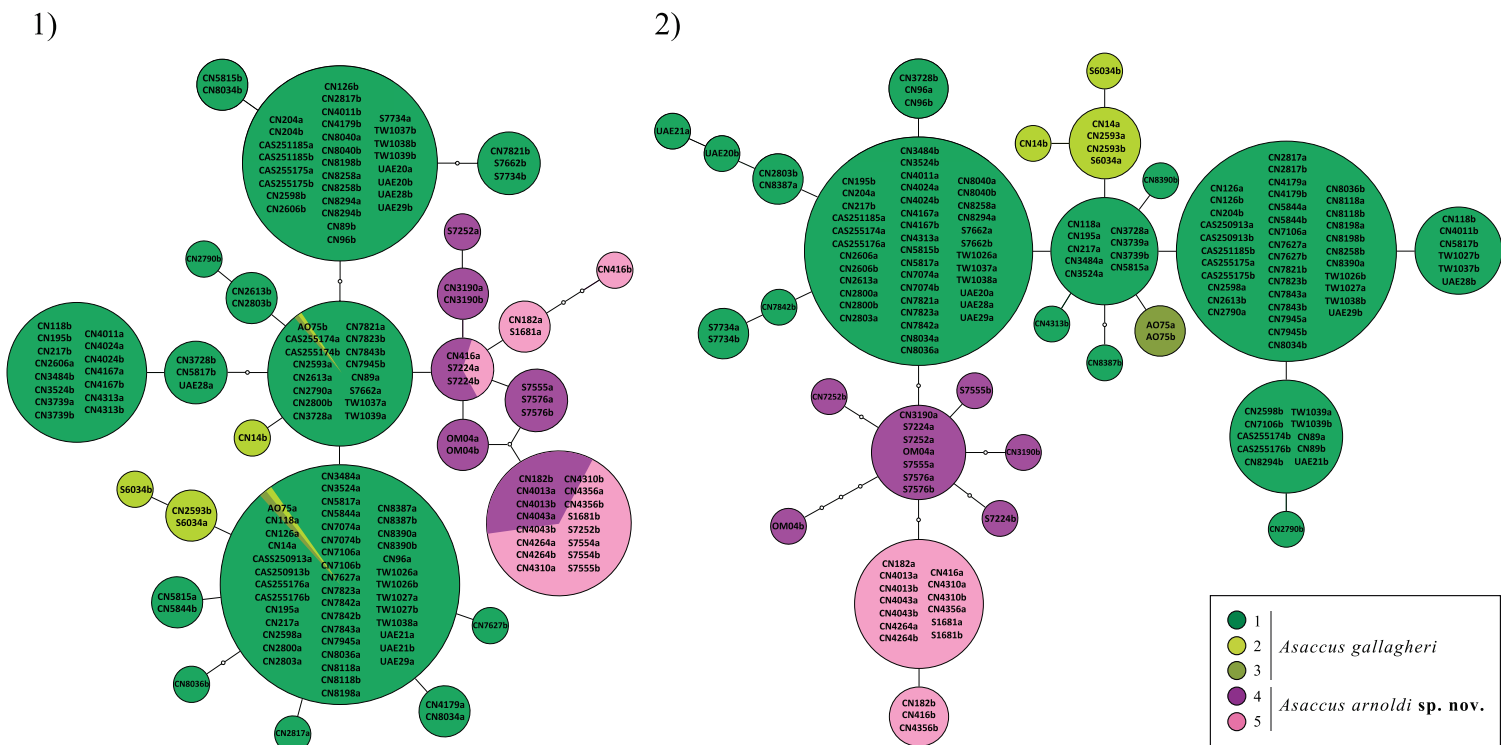

Supplement: Supplementary file 1 [file 1]
