# Supplementary material
Source: publisher figshare collection journal article supplement (https://tandf.figshare.com/articles/dataset/_/5705203)

**Figure S1. Maximum-likelihood (ML) phylogenetic tree of 10 *Asaccus* species.** The phylogeny is based on the concatenated sequences of two mitochondrial (12S and cytb) and two nuclear (c-mos and MC1R) genes. Bootstrap values of the ML analysis are shown next to the nodes.

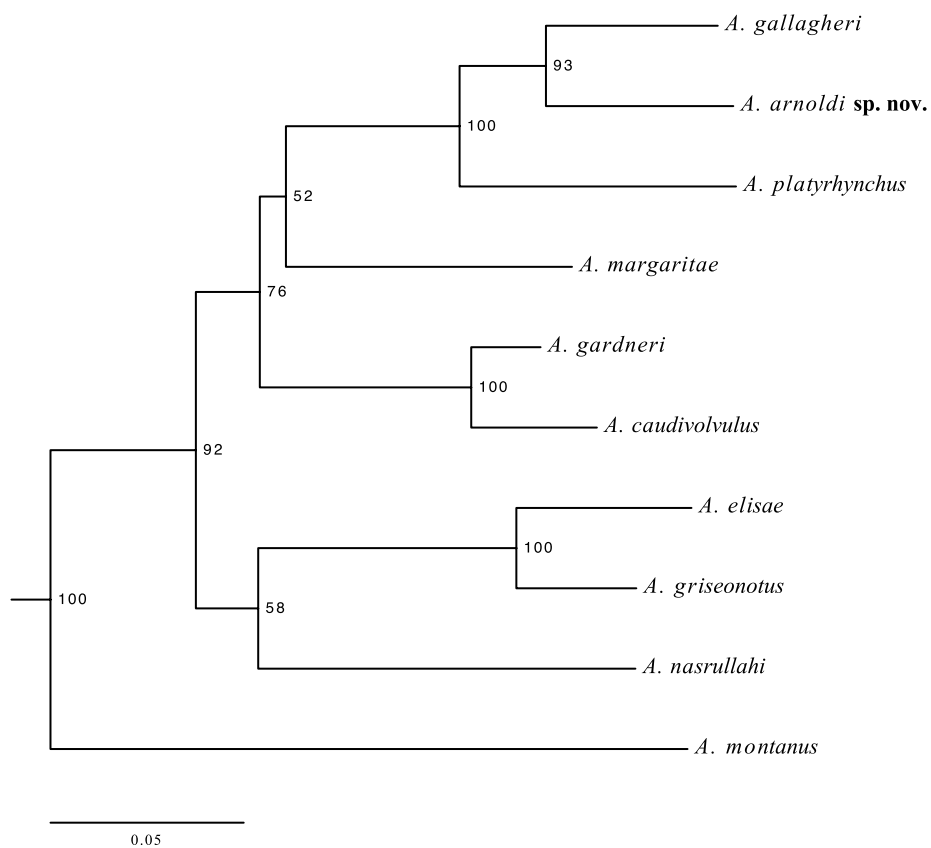

Supplement: Supplementary file 2 [file 1]
