# Supplementary material
Source: publisher figshare collection journal article supplement (https://tandf.figshare.com/articles/dataset/_/5705203)
Supplement: Supplementary file 3 [file 1]

Archive with 11 entries (11 files):
- tsab_a_1403496_sm2344.doc
- tsab_a_1403496_sm2343.docx
- tsab_a_1403496_sm2340.docx
- tsab_a_1403496_sm2339.docx
- tsab_a_1403496_sm2336.docx
- tsab_a_1403496_sm2334.docx
- tsab_a_1403496_sm2330.pdf
- tsab_a_1403496_sm2329.pdf
- tsab_a_1403496_sm2326.pdf
- tsab_a_1403496_sm2325.pdf
- tsab_a_1403496_sm2324.pdf
