# Supplementary material
Source: publisher figshare collection journal article supplement (https://tandf.figshare.com/articles/dataset/_/5705203)

**Figure S2. Geographic structure.** Bayesian inference tree using the BSSVS method of ancestral area reconstruction in which branch colours indicate inferred ancestral range. A pie chart describing the probability of each inferred area is presented near the relevant nodes. A map of the Hajar Mountains of south-eastern Arabia showing the three main areas; the Western Hajars, the Jebel Akhdar and the Eastern Hajars, is also shown.

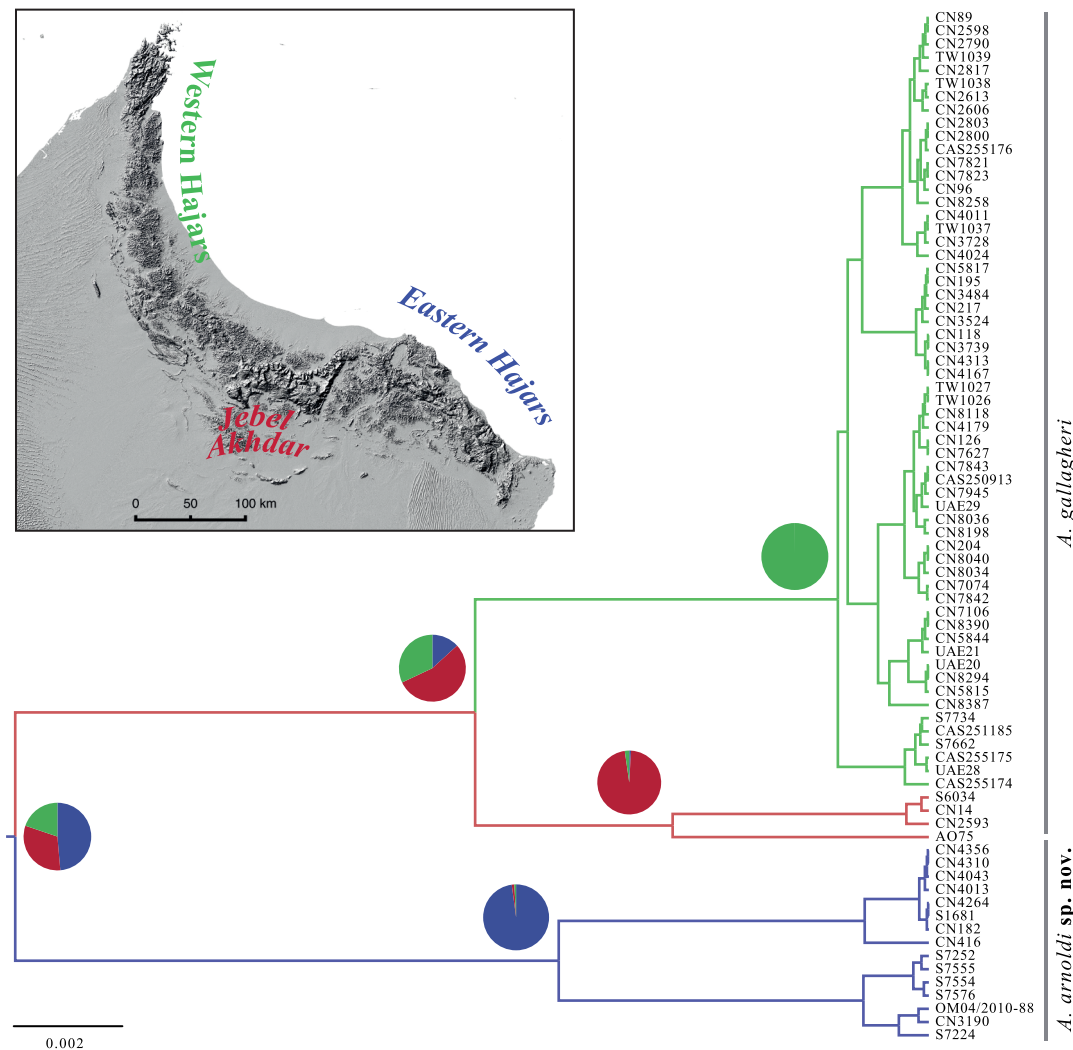

Supplement: Supplementary file 3 [file 1 › tsab_a_1403496_sm2325.pdf]
