# Supplementary material
Source: publisher figshare collection journal article supplement (https://tandf.figshare.com/articles/dataset/_/5705203)

**Figure S4. Estimated hypervolume size for *Asaccus gallagheri* (A) and *A. arnoldi* sp. nov. (B)** A set of operations were performed using both hypervolumes to show the degree of overlap (intersection), total size (union) and unique components of the three dimensional hypervolume of each species in respect of the other. 1) Data for morphological hypervolumes; 2) Data for environmental hypervolumes.

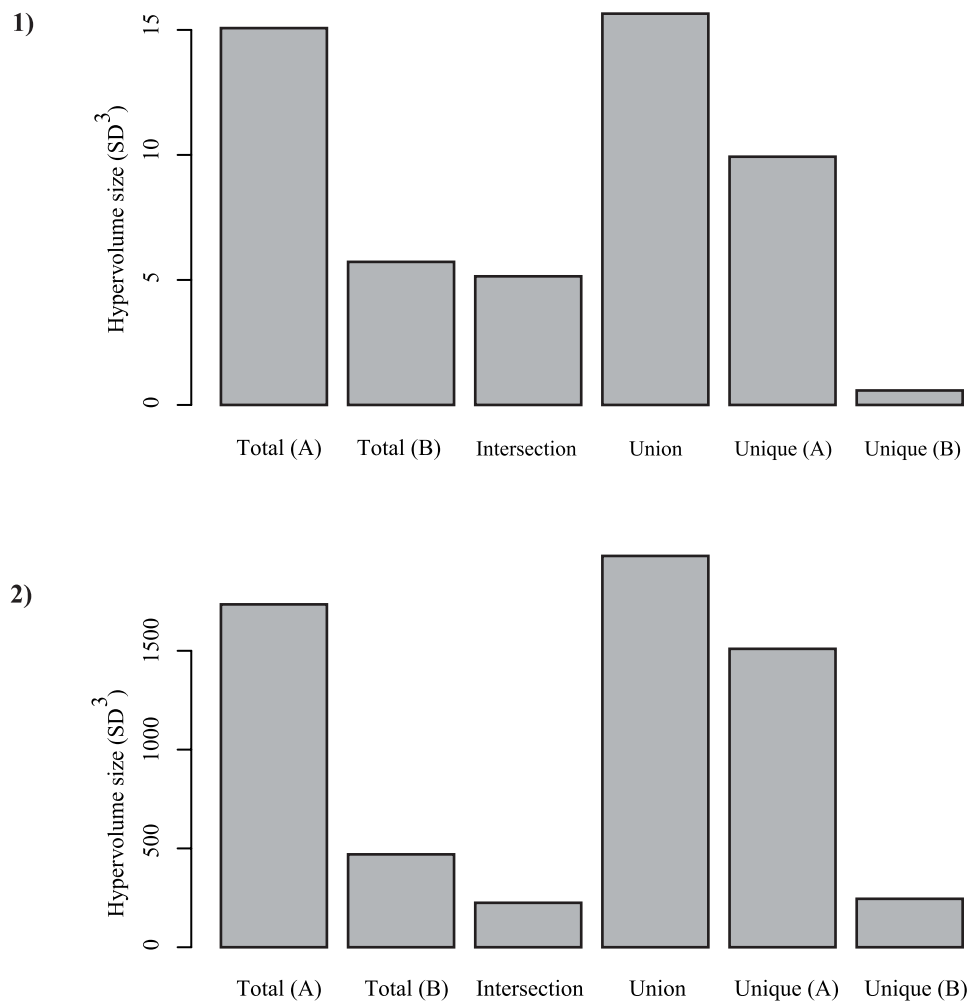

Supplement: Supplementary file 3 [file 1 › tsab_a_1403496_sm2329.pdf]
