# Supplementary material
Source: publisher figshare collection journal article supplement (https://tandf.figshare.com/articles/dataset/_/5705203)

**Figure S5. Estimated null distribution (grey bars) for the hypothesis of environmental niche and morphospace equivalence or maximum overlap after replicates.** 1) Data for morphological hypervolumes; 2) Data for environmental hypervolumes. The red arrow locates the observed Sørensen and overlap index. Both are significant and indicate that the overlap is smaller than expected under the hypothesis of niche equivalency.

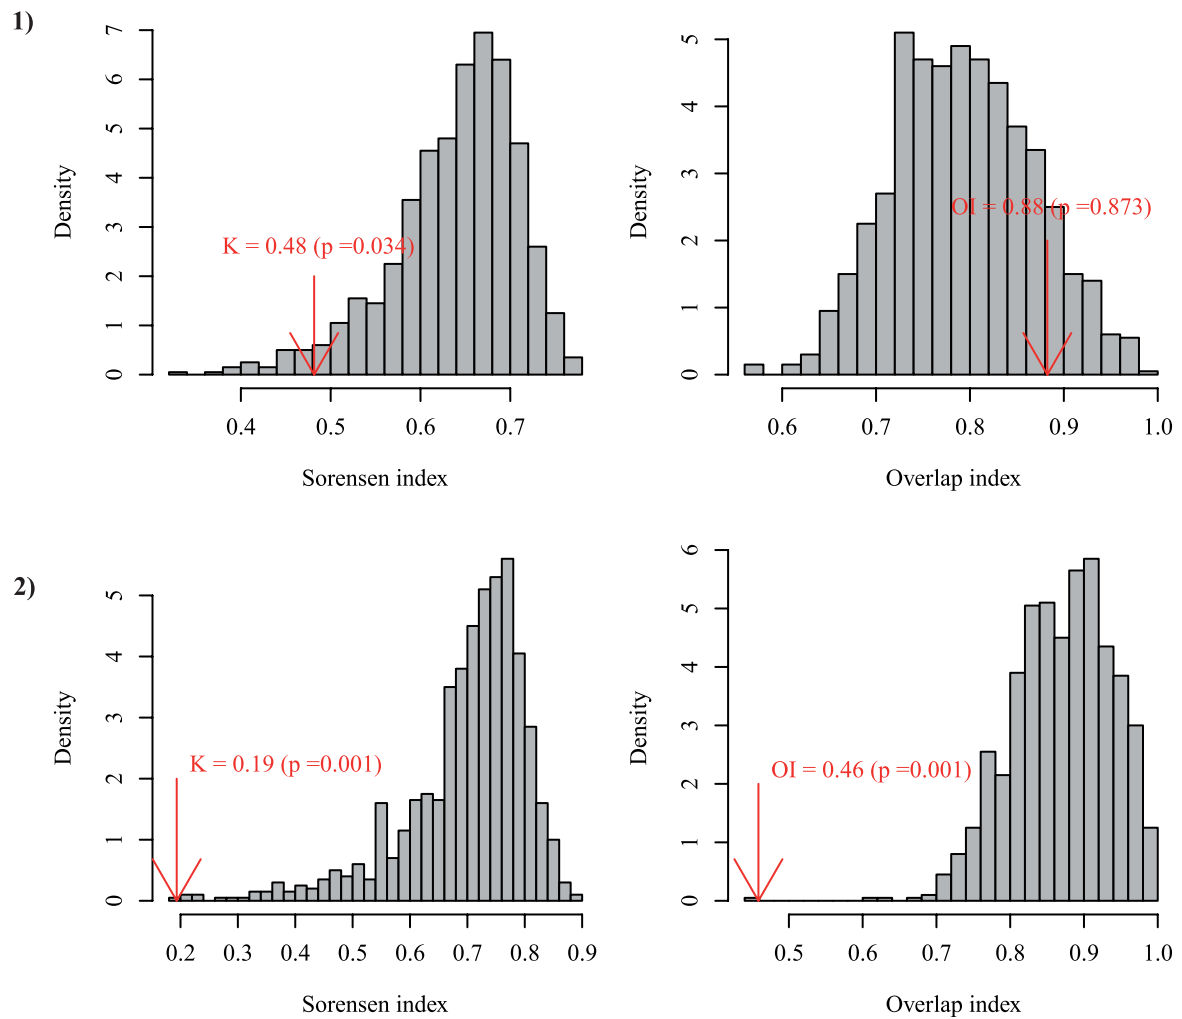

Supplement: Supplementary file 3 [file 1 › tsab_a_1403496_sm2330.pdf]
