# Supplementary material
Source: publisher figshare collection journal article supplement (https://tandf.figshare.com/articles/dataset/_/5705203)
Supplement: Supplementary file 3 [file 1 › tsab_a_1403496_sm2334.docx]

**Table S1. Information on the specimens used in the phylogenetic (sample code) and morphological (voucher code) analyses, with locality data and GenBank accession numbers.** Voucher codes of specimens available refer to the following collections; BMNH: British Museum of Natural History; IBE: Institute of Evolutionary Biology (CSIC-UPF), Barcelona, Spain; MVZ: Museum of Vertebrate Zoology, California, Berkeley; ONHM: Oman Natural History Museum; TW: Private collection of Thomas Wilms, Münster, Germany. The holotype (*) and paratypes are underlined.

| **Species** | **GMYC clade** | **Sample code** | **Voucher code** | **Country** | **Locality** | **Latitude** | **Longitude** | **Elevation** | ***12S*** | ***cytb*** | ***cmos*** | ***mc1r*** |
| --- | --- | --- | --- | --- | --- | --- | --- | --- | --- | --- | --- | --- |
| *A. gallagheri* | 1 | CN8294 | IBECN8294 | Oman | 1 | 26.208 | 56.242 | 33 | MG019437 | MG019690 | MG019569 | MG019572 |
| *A. gallagheri* | 1 | CN5815 | IBECN5815 | Oman | 2 | 26.150 | 56.162 | 42 | MG019469 | MG019691 | MG019526 | MG019603 |
| *A. gallagheri* | 1 | CN5844 | IBECN5844 | Oman | 2 | 26.149 | 56.162 | 10 | MG019468 | MG019692 | MG019527 | MG019604 |
| *A. gallagheri* | 1 | UAE20 |  | Oman | 3 | 26.099 | 56.329 | 56 | MG019435 | MG019689 | MG019498 | MG019592 |
| *A. gallagheri* | 1 | UAE21 |  | Oman | 3 | 26.099 | 56.329 | 56 | MG019434 | MG019693 | MG019565 | MG019641 |
| *A. gallagheri* | 1 | CN8387 |  | Oman | 4 | 25.979 | 56.205 | 1348 | MG019433 | MG019696 | MG019514 | MG019593 |
| *A. gallagheri* | 1 | CN7945 | IBECN7945 | Oman | 4 | 25.978 | 56.205 | 1315 | MG019425 | MG019675 | MG019568 | MG019577 |
| *A. gallagheri* | 1 | CN7106 | IBECN7106 | UAE | 5 | 25.974 | 56.100 | 60 | MG019438 | MG019695 | MG019511 | MG019587 |
| *A. gallagheri* | 1 | CAS250913 |  | Oman | 6 | 25.966 | 56.198 | 1488 | MG019428 | MG019683 | MG019564 | MG019640 |
| *A. gallagheri* | 1 | CN8198 |  | Oman | 7 | 25.952 | 56.240 | 1334 | MG019423 | MG019688 | MG019501 | MG019579 |
| *A. gallagheri* | 1 | CN8390 |  | Oman | 8 | 25.943 | 56.236 | 1157 | MG019436 | MG019694 | MG019515 | MG019588 |
| *A. gallagheri* | 1 | CN8040 | IBECN8040 | Oman | 9 | 25.785 | 56.216 | 997 | MG019424 | – | MG019496 | MG019590 |
| *A. gallagheri* | 1 | CN7627 |  | Oman | 9 | 25.783 | 56.213 | 988 | MG019417 | MG019685 | MG019516 | MG019575 |
| *A. gallagheri* | 1 | CN126 |  | Oman | 9 | 25.783 | 56.214 | 980 | MG019427 | MG019686 | MG019500 | MG019645 |
| *A. gallagheri* | 1 | TW1026 | TW1026 | UAE | 10 | 25.614 | 56.030 | 214 | MG019432 | MG019681 | MG019559 | MG019635 |
| *A. gallagheri* | 1 | TW1027 | TW1027 | UAE | 10 | 25.614 | 56.030 | 214 | MG019431 | MG019682 | MG019560 | MG019636 |
| *A. gallagheri* | 1 | S7734 | IBES7734 | UAE | 11 | 25.478 | 56.362 | 9 | MG019462 | MG019699 | MG019557 | MG019633 |
| *A. gallagheri* | 1 | CN7074 | IBECN7074 | UAE | 12 | 25.460 | 56.181 | 243 | MG019416 | MG019678 | MG019510 | MG019589 |
| *A. gallagheri* | 1 | CN204 | IBECN204 | UAE | 12 | 25.459 | 56.184 | 216 | MG019418 | MG019676 | MG019495 | MG019580 |
| *A. gallagheri* | 1 | CN4179 | IBECN4179 | UAE | 12 | 25.459 | 56.184 | 216 | MG019419 | MG019679 | MG019503 | MG019574 |
| *A. gallagheri* | 1 | CN7842 |  | UAE | 12 | 25.459 | 56.184 | 216 | MG019426 | MG019677 | MG019512 | MG019591 |
| *A. gallagheri* | 1 | CN8034 |  | UAE | 12 | 25.459 | 56.184 | 216 | MG019422 | MG019684 | MG019504 | MG019583 |
| *A. gallagheri* | 1 | CN8036 | IBECN8036 | UAE | 12 | 25.459 | 56.184 | 216 | MG019429 | MG019687 | MG019517 | MG019584 |
| *A. gallagheri* | 1 | CN8118 |  | UAE | 12 | 25.459 | 56.184 | 216 | MG019421 | MG019680 | MG019513 | MG019578 |
| *A. gallagheri* | 1 | UAE28 |  | UAE | 13 | 25.417 | 56.168 | 446 | MG019461 | – | MG019567 | MG019643 |
| *A. gallagheri* | 1 | UAE29 |  | UAE | 13 | 25.417 | 56.168 | 446 | MG019430 | – | MG019502 | MG019586 |
| *A. gallagheri* | 1 | CAS251185 |  | UAE | 14 | 25.324 | 56.163 | 454 | MG019460 | MG019700 | MG019493 | MG019644 |
| *A. gallagheri* | 1 | CAS255174 |  | UAE | 14 | 25.324 | 56.163 | 454 | MG019458 | MG019697 | MG019507 | MG019570 |
| *A. gallagheri* | 1 | CAS255175 |  | UAE | 14 | 25.324 | 56.163 | 454 | MG019459 | MG019701 | MG019494 | MG019573 |
| *A. gallagheri* | 1 | CAS255176 |  | UAE | 14 | 25.324 | 56.162 | 453 | MG019456 | MG019647 | MG019509 | MG019571 |
| *A. gallagheri* | 1 | S7662 | IBES7662 | UAE | 15 | 25.322 | 56.343 | 27 | MG019463 | MG019698 | MG019551 | MG019628 |
| *A. gallagheri* | 1 | CN7821 |  | UAE | 16 | 25.182 | 56.229 | 184 | MG019444 | MG019646 | MG019508 | MG019581 |
| *A. gallagheri* | 1 | CN7823 |  | UAE | 16 | 25.182 | 56.229 | 184 | MG019439 | MG019648 | MG019505 | MG019582 |
| *A. gallagheri* | 1 | CN7843 |  | UAE | 16 | 25.182 | 56.229 | 184 | MG019420 | MG019674 | MG019506 | MG019576 |
| *A. gallagheri* | 1 | CN8258 |  | UAE | 16 | 25.182 | 56.226 | 207 | MG019443 | MG019650 | MG019497 | MG019585 |
| *A. gallagheri* | 1 | CN96 | IBECN96 | UAE | 16 | 25.182 | 56.226 | 207 | MG019454 | MG019649 | MG019499 | MG019594 |
| *A. gallagheri* | 1 | CN89 | IBECN89 | UAE | 17 | 25.016 | 56.209 | 417 | MG019455 | MG019651 | MG019528 | MG019605 |
| *A. gallagheri* | 1 | CN2598 | IBECN2598 | UAE | 17 | 25.016 | 56.208 | 431 | MG019453 | MG019654 | MG019533 | MG019610 |
| *A. gallagheri* | 1 | CN2606 | IBECN2606 | UAE | 17 | 25.016 | 56.208 | 431 | MG019457 | MG019662 | MG019532 | MG019609 |
| *A. gallagheri* | 1 | CN2613 | IBECN2613 | UAE | 17 | 25.016 | 56.208 | 431 | MG019452 | MG019661 | MG019535 | MG019612 |
| *A. gallagheri* | 1 | CN2800 | IBECN2800 | UAE | 17 | 25.016 | 56.208 | 431 | MG019450 | MG019652 | MG019529 | MG019606 |
| *A. gallagheri* | 1 | CN2803 | IBECN2803 | UAE | 17 | 25.016 | 56.208 | 431 | MG019449 | MG019653 | MG019530 | MG019607 |
| *A. gallagheri* | 1 | CN2817 | IBECN2817 | UAE | 17 | 25.016 | 56.208 | 431 | MG019448 | MG019660 | MG019531 | MG019608 |
| *A. gallagheri* | 1 | CN2790 | IBECN2790 | UAE | 17 | 25.015 | 56.210 | 405 | MG019451 | MG019655 | MG019534 | MG019611 |
| *A. gallagheri* | 1 | TW1037 | TW1037 | UAE | 18 | 24.991 | 56.217 | 342 | MG019442 | MG019659 | MG019561 | MG019637 |
| *A. gallagheri* | 1 | TW1038 | TW1038 | UAE | 18 | 24.991 | 56.217 | 342 | MG019441 | MG019663 | MG019562 | MG019638 |
| *A. gallagheri* | 1 | TW1039 | TW1039 | UAE | 18 | 24.991 | 56.217 | 342 | MG019440 | MG019664 | MG019563 | MG019639 |
| *A. gallagheri* | 1 | CN4024 | IBECN4024 | Oman | 19 | 24.621 | 56.339 | 260 | MG019445 | MG019656 | MG019538 | MG019615 |
| *A. gallagheri* | 1 | CN3728 | IBECN3728 | Oman | 19 | 24.621 | 56.339 | 260 | MG019447 | MG019657 | MG019539 | MG019616 |
| *A. gallagheri* | 1 | CN4011 | IBECN4011 | Oman | 19 | 24.621 | 56.340 | 251 | MG019446 | MG019658 | MG019540 | MG019617 |
| *A. gallagheri* | 1 | CN118 | IBECN118 | Oman | 20 | 24.513 | 56.463 | 99 | MG019474 | MG019672 | MG019548 | MG019625 |
| *A. gallagheri* | 1 | CN195 | IBECN195 | Oman | 20 | 24.513 | 56.463 | 99 | MG019473 | MG019671 | MG019549 | MG019626 |
| *A. gallagheri* | 1 | CN3484 | IBECN3484 | Oman | 20 | 24.513 | 56.463 | 99 | MG019471 | MG019667 | MG019544 | MG019621 |
| *A. gallagheri* | 1 | CN3524 | IBECN3524 | Oman | 20 | 24.513 | 56.463 | 99 | MG019470 | MG019673 | MG019543 | MG019620 |
| *A. gallagheri* | 1 | CN3739 | IBECN3739 | Oman | 20 | 24.513 | 56.463 | 99 | MG019467 | MG019665 | MG019541 | MG019618 |
| *A. gallagheri* | 1 | CN4167 | IBECN4167 | Oman | 20 | 24.513 | 56.463 | 99 | MG019466 | MG019666 | MG019542 | MG019619 |
| *A. gallagheri* | 1 | CN4313 | IBECN4313 | Oman | 20 | 24.513 | 56.463 | 99 | MG019465 | MG019670 | MG019547 | MG019624 |
| *A. gallagheri* | 1 | CN5817 | IBECN5817 | Oman | 20 | 24.513 | 56.463 | 99 | MG019464 | MG019668 | MG019545 | MG019622 |
| *A. gallagheri* | 1 | CN217 | IBECN217 | Oman | 20 | 24.513 | 56.464 | 107 | MG019472 | MG019669 | MG019546 | MG019623 |
| *A. gallagheri* | 2 | CN2593 | IBECN2593 | Oman | 21 | 23.192 | 57.199 | 1830 | MG019477 | MG019702 | MG019537 | MG019614 |
| *A. gallagheri* | 3 | AO75 |  | Oman | 22 | 23.173 | 57.432 | 1654 | MG019478 | MG019703 | MG019566 | MG019642 |
| *A. gallagheri* | 2 | CN14 | IBECN14 | Oman | 23 | 23.069 | 57.473 | 640 | MG019476 | – | MG019536 | MG019613 |
| *A. gallagheri* | 2 | S6034 | IBES6034 | Oman | 24 | 22.935 | 57.673 | 588 | MG019475 | – | MG019550 | MG019627 |
| *A. arnoldi* **sp. nov.** | 4 | S7224 | IBES7224 | Oman | 25 | 23.132 | 58.619 | 1669 | MG019481 | MG019706 | MG019556 | MG019632 |
| *A. arnoldi* **sp. nov.** | 4 | OM04/2010-88 |  | Oman | 26 | 23.219 | 58.820 | 280 | MG019483 | MG019704 | MG019518 | MG019595 |
| *A. arnoldi* **sp. nov.** | 4 | CN3190 | IBECN3190 | Oman | 27 | 23.085 | 58.872 | 104 | MG019484 | MG019705 | MG019521 | MG019598 |
| *A. arnoldi* **sp. nov.** | 4 | S7252 | ONHM4234 | Oman | 28 | 22.616 | 59.094 | 640 | MG019492 | MG019709 | MG019555 | MG019631 |
| *A. arnoldi* **sp. nov.** | 4 | S7554 | BMNH2008.962 | Oman | 28 | 22.616 | 59.094 | 640 | MG019480 | MG019708 | MG019553 | – |
| *A. arnoldi* **sp. nov.** | 4 | S7555 | BMNH2008.961* | Oman | 28 | 22.616 | 59.094 | 640 | MG019482 | MG019710 | MG019554 | MG019630 |
| *A. arnoldi* **sp. nov.** | 4 | S7576 | IBES7576 | Oman | 28 | 22.616 | 59.094 | 640 | MG019479 | MG019707 | MG019552 | MG019629 |
| *A. arnoldi* **sp. nov.** | 5 | CN416 | IBECN416 | Oman | 29 | 22.801 | 59.246 | 36 | MG019491 | – | MG019520 | MG019597 |
| *A. arnoldi* **sp. nov.** | 5 | S1681 |  | Oman | 30 | 22.182 | 59.318 | 311 | MG019485 | MG019713 | MG019558 | MG019634 |
| *A. arnoldi* **sp. nov.** | 5 | CN182 | IBECN182 | Oman | 31 | 22.169 | 59.414 | 227 | MG019490 | MG019712 | MG019523 | MG019600 |
| *A. arnoldi* **sp. nov.** | 5 | CN4310 | IBECN4310 | Oman | 32 | 22.107 | 59.357 | 194 | KX550526 | KX550534 | KX550707 | KX550794 |
| *A. arnoldi* **sp. nov.** | 5 | CN4013 | IBECN4013 | Oman | 32 | 22.107 | 59.357 | 194 | MG019489 | MG019716 | MG019525 | MG019602 |
| *A. arnoldi* **sp. nov.** | 5 | CN4043 | IBECN4043 | Oman | 32 | 22.107 | 59.357 | 194 | MG019488 | MG019715 | MG019524 | MG019601 |
| *A. arnoldi* **sp. nov.** | 5 | CN4264 | IBECN4264 | Oman | 32 | 22.107 | 59.357 | 194 | MG019487 | MG019711 | MG019519 | MG019596 |
| *A. arnoldi* **sp. nov.** | 5 | CN4356 | IBECN4356 | Oman | 32 | 22.107 | 59.357 | 194 | MG019486 | MG019714 | MG019522 | MG019599 |
| *A. caudivolvulus* |  | UAE27 |  | UAE |  |  |  |  | KX550495 | KX550588 | KX550762 | KX550848 |
| *A. gardneri* |  | CN9024 |  | Oman |  |  |  |  | KX550462 | KX550557 | KX550731 | KX550818 |
| *A. margaritae* |  | CN3967 |  | UAE |  |  |  |  | KX550523 | KX550616 | KX550789 | KX550875 |
| *A. platyrhynchus* |  | S1751 |  | Oman |  |  |  |  | KX550525 | KX550533 | KX550706 | KX550793 |
| *A. griseonotus* |  | MVZ234326 |  | Iran |  |  |  |  | KX550528 | KX550535 | KX550709 | KX550796 |
| *A. elisae* |  | MVZ234315 |  | Iran |  |  |  |  | KX550527 | – | KX550708 | KX550795 |
| *A. nasrullahi* |  | MVZ234330 |  | Iran |  |  |  |  | KX550529 | KX550536 | KX550710 | KX550797 |
| *A. montanus* |  | AO43 |  | Oman |  |  |  |  | KX550530 | KX550537 | KX550711 | KX550798 |
| *H. riebeckii* |  | S5011 |  | Socotra |  |  |  |  | KX550532 | KX550539 | KX550713 | KX550800 |
| *H. trachyrinus* |  | S5290 |  | Socotra |  |  |  |  | KX550531 | KX550538 | KX550712 | KX550799 |
