# Supplementary material
Source: publisher figshare collection journal article supplement (https://tandf.figshare.com/articles/dataset/_/5705203)
Supplement: Supplementary file 3 [file 1 › tsab_a_1403496_sm2336.docx]

| **Locus** | **Primer name** | **OR** | **Sequence (5’- 3’)** | **Reference** | **PCR conditions** |
| --- | --- | --- | --- | --- | --- |
| *12S* | 12SaGekko | F | CAAACTAGGATTAGATACCCTACTATGC | Metallinou et al. (2015) | 94º(5’);94º(45”), 52º(45”), 72º(80”) x 35;72(5’) |
| 12SbGekko | R | GAGGGTGACGGGCGGTGTGTAC | Metallinou et al. (2015) |
| *cytb* | Salvi1 | F | TCCAACTACAAAAACCTAATGACCC | Metallinou et al. (2015) | 94º(5’);94º(30”), 48º(45”), 72º(60”) x 35;72º(5’) |
| cytb2 | R | CCCTCAGAATGATATTTGTCCTCA | Palumbi et al. (1991) |
| *c-mos* | CMOS-FUF | F | TTTGGTTCKGTCTACAAGGCTAC | Gamble et al. (2008) | 94º (5’);94º(45”), 55º (45”), 72º (70”) x 40;72º (10’) |
| CMOS-FUR | R | AGGGAACATCCAAAGTCTCCAAT | Gamble et al. (2008) |
| *MC1R* | MC1R-F | F | GGCNGCCATYGTCAAGAACCGGAACC | Pinho et al. (2010) | 94º(5’);94º(30”), 52º(45”), 72º (90”) x 40;72º(5’) |
| MC1R-R | R | CTCCGRAAGGCRTAAATGATGGGGTCCAC | Pinho et al. (2010) |

**Table S2.** List of primers used in the amplification and sequencing of gene fragments, with the corresponding source and PCR conditions. Primer orientation (OR); F=forward, R=reverse.
