# Supplementary material
Source: publisher figshare collection journal article supplement (https://tandf.figshare.com/articles/dataset/_/5705203)
Supplement: Supplementary file 3 [file 1 › tsab_a_1403496_sm2339.docx]

**Table S3. Genetic distances between all *Asaccus* species included in the molecular phylogenetic analyses.** Uncorrected *p*-distances for two mitochondrial genes: *12S* (lower-left) and *cytb* (upper-right). Genetic distances between *A. gallagheri* and *A. arnoldi* **sp. nov.** in bold.

|  | 1. | 2. | 3. | 4. | 5. | 6. | 7. | 8. | 9. | 10. |
| --- | --- | --- | --- | --- | --- | --- | --- | --- | --- | --- |
| 1. *A. gardneri* |  | 12.8 | 25.1 | 29.6 | 24.2 | 25.3 | 30.6 | – | 22.3 | 26 |
| 2. *A. caudivolvulus* | 7 |  | 26.3 | 27.8 | 26.3 | 25.6 | 30.1 | – | 23 | 26 |
| 3. *A. margaritae* | 14.5 | 16 |  | 26 | 25 | 26.1 | 27.6 | – | 23.5 | 26 |
| 4. *A. gallagheri* | 16.5 | 18.1 | 16.4 |  | **20.8** | 27.1 | 31.6 | – | 26.7 | 29.6 |
| 5. *A. arnoldi* **sp. nov.** | 15.9 | 17.6 | 15.3 | **12.7** |  | 22.5 | 30 | – | 24.5 | 28.7 |
| 6. *A. platyrhynchus* | 17.4 | 18.2 | 13.7 | 13.7 | 12.8 |  | 30.8 | – | 25.6 | 30.4 |
| 7. *A. montanus* | 21.9 | 23.2 | 22 | 20.5 | 17.3 | 19.7 |  | – | 27.4 | 27.8 |
| 8. *A. elisae* | 19.4 | 22.1 | 20.8 | 20.8 | 18.3 | 21.1 | 22.6 |  | – | – |
| 9. *A. griseonotus* | 19.7 | 20.3 | 21.4 | 20.9 | 20.6 | 23 | 22.1 | 12.4 |  | 24.5 |
| 10. *A. nasrullahi* | 15 | 16 | 17.5 | 17.2 | 15.1 | 18.1 | 21.1 | 19 | 19.5 |  |
