# Supplementary material
Source: publisher figshare collection journal article supplement (https://tandf.figshare.com/articles/dataset/_/5705203)
Supplement: Supplementary file 3 [file 1 › tsab_a_1403496_sm2340.docx]

**Table S4.** **Sex, metric, meristic and categorical variables and Morphobank accession numbers for the pictures of all examined specimens of *A. arnoldi* sp. nov. and *A. gallagheri*.** Summary statistics for each species are also given. Abbreviations of characters as explained in the material and methods. Corresponding mitochondrial lineages identified within both species are also included. The holotype (*) and paratypes are underlined. Museums acronyms as in Table S1.

| **Species** | **Mit. lineage** | **Voucher code** | **Sex** | **SVL** | **TrL** | **HL** | **HW** | **HH** | **SL** | **SW** | **ED** | **LUn** | **LHu** | **LTb** | **LFe** | **ULS** | **LLS** | **PM** | **MorphoBank** |
| --- | --- | --- | --- | --- | --- | --- | --- | --- | --- | --- | --- | --- | --- | --- | --- | --- | --- | --- | --- |
| *A. arnoldi* **sp. nov.** | 4 | IBES7224 | M | 33.6 | 13.2 | 8.7 | 5.2 | 3.2 | 3.9 | 2.8 | 1.9 | 5.1 | 5.2 | 6.8 | 7 | 12 | 10 | 0 | M462312- M462313 |
| *A. arnoldi* **sp. nov.** | 4 | BMNH2008.961* | M | 31.4 | 11.8 | 8.1 | 5.3 | 3 | 3.7 | 2.9 | 1.9 | 4.9 | 4.4 | 6.3 | 6.4 | 11 | 9 | 0 | M462304- M462307 |
| *A. arnoldi* **sp. nov.** | 4 | IBES7576 | M | 30.8 | 11.3 | 8.3 | 5.4 | 3.1 | 3.6 | 2.7 | 2 | 4.9 | 4.3 | 6 | 6.2 | 10 | 9 | 0 | M462321- M462322 |
| *A. arnoldi* **sp. nov.** | 5 | IBECN4013 | M | 28.6 | 11.3 | 7.6 | 5 | 2.8 | 3.2 | 2.3 | 1.6 | 4.2 | 4.2 | 5.3 | 6 | 10 | 8 | 0 | M462328- M462329 |
| *A. arnoldi* **sp. nov.** | 5 | IBECN4043 | M | 27.4 | 10.5 | 7.1 | 4.6 | 2.6 | 3.2 | 2.4 | 1.7 | 4.1 | 3.9 | 5.4 | 5.6 | 10 | 8 | 0 | M462330- M462331 |
| *A. arnoldi* **sp. nov.** | 5 | IBECN4264 | M | 27.4 | 10.9 | 7.4 | 4.8 | 2.7 | 3.4 | 2.3 | 1.7 | 4.2 | 4.2 | 5.3 | 5.7 | 11 | 8 | 1 | M462332- M462333 |
| *A. arnoldi* **sp. nov.** | 4 | IBECN3190 | F | 29.3 | 12.1 | 7.7 | 4.9 | 2.8 | 3.7 | 2.5 | 1.9 | 4.3 | 4.6 | 5.9 | 6.3 | 10 | 9 | 0 | M462310- M462311 |
| *A. arnoldi* **sp. nov.** | 4 | ONHM4234 | F | 28.9 | 11.4 | 7.5 | 4.9 | 2.7 | 3.4 | 2.6 | 1.8 | 4.6 | 3.9 | 5.2 | 6.2 | 10 | 8 | 0 | M462314- M462315 |
| *A. arnoldi* **sp. nov.** | 4 | BMNH2008.962 | F | 33.3 | 12 | 8.4 | 5.3 | 3.1 | 4 | 2.9 | 1.9 | 4.7 | 4.9 | 6.2 | 6.8 | 12 | 8 | 1 | M462308- M462309 |
| *A. arnoldi* **sp. nov.** | 5 | IBECN416 | F | 31.8 | 11.9 | 8.3 | 5.1 | 3.1 | 3.8 | 2.7 | 2 | 4.6 | 5 | 6.1 | 7 | 11 | 9 | 1 | M462326- M462327 |
| *A. arnoldi* **sp. nov.** | 5 | IBECN4310 | F | 29.4 | 11.5 | 7.4 | 4.7 | 2.9 | 3.4 | 2.6 | 1.7 | 4.6 | 3.9 | 5.5 | 6.1 | 10 | 8 | 1 | M462334- M462335 |
| *A. arnoldi* **sp. nov.** | 5 | IBECN4356 | F | 32.4 | 13.3 | 8.5 | 5.1 | 3.1 | 3.7 | 2.8 | 2.1 | 4.7 | 4.3 | 6 | 6.4 | 10 | 9 | 1 | M462336- M462337 |
| *A. arnoldi* **sp. nov.** | 5 | IBECN182 | F | 29.9 | 12.6 | 7.9 | 5.1 | 2.8 | 3.4 | 2.8 | 1.8 | 4.5 | 4.3 | 5.9 | 6.6 | 11 | 8 | 1 | M462324- M462325 |
|  |  | **Summary Statistics (Total)** |  |  |  |  |  |  |  |  |  |  |  |  |  |  |  |  |  |
|  |  | Mean |  | 30.3 | 11.8 | 7.9 | 5 | 2.9 | 3.6 | 2.6 | 1.8 | 4.6 | 4.4 | 5.8 | 6.3 | 10.6 | 8.5 | - |  |
|  |  | Standard Deviation |  | 2.1 | 0.8 | 0.5 | 0.3 | 0.2 | 0.3 | 0.2 | 0.2 | 0.3 | 0.4 | 0.5 | 0.5 | 0.8 | 0.7 | - |  |
|  |  | Minimum |  | 27.4 | 10.5 | 7.1 | 4.6 | 2.6 | 3.2 | 2.3 | 1.6 | 4.1 | 3.9 | 5.2 | 5.6 | 10 | 8 | - |  |
|  |  | Maximum |  | 33.6 | 13.3 | 8.7 | 5.4 | 3.2 | 4 | 2.9 | 2.1 | 5.1 | 5.2 | 6.8 | 7 | 12 | 10 | - |  |
| *A. gallagheri* | 1 | IBES7734 | M | 35.3 | 15.1 | 9.2 | 5.8 | 3.4 | 4.1 | 3 | 2.3 | 5.4 | 4.5 | 7.3 | 6.5 | 12 | 9 | 1 | M462485- M462486 |
| *A. gallagheri* | 1 | IBECN118 | M | 32.8 | 12.5 | 8.5 | 5.7 | 3.3 | 3.7 | 2.7 | 2 | 5 | 4.7 | 6.3 | 7 | 12 | 10 | 0 | M462350- M462351 |
| *A. gallagheri* | 1 | IBECN195 | M | 33.1 | 13.3 | 8.6 | 5.8 | 3.4 | 4 | 3 | 2.1 | 5.1 | 5.2 | 6.5 | 7.4 | 11 | 9 | 1 | M462423- M462424 |
| *A. gallagheri* | 1 | IBECN2598 | M | 30 | 11.3 | 8 | 4.6 | 3.1 | 3.7 | 2.6 | 1.8 | 4.6 | 4.5 | 5.6 | 6.4 | 11 | 9 | 1 | M462429- M462430 |
| *A. gallagheri* | 1 | IBECN2606 | M | 35.9 | 13.8 | 9.7 | 6 | 3.8 | 4.4 | 3.2 | 2.2 | 5.5 | 6 | 7.7 | 8.5 | 12 | 10 | 1 | M462431- M462432 |
| *A. gallagheri* | 1 | IBECN2790 | M | 35.7 | 15.1 | 9.4 | 6.1 | 3.3 | 4.2 | 3 | 2.2 | 5.4 | 4.7 | 7.1 | 6.8 | 12 | 8 | 1 | M462437- M462438 |
| *A. gallagheri* | 1 | IBECN2803 | M | 36.4 | 14.4 | 9.4 | 6.2 | 3.7 | 4.1 | 3.1 | 2.2 | 5.6 | 5.8 | 7.7 | 7.9 | 11 | 10 | 1 | M462441- M462442 |
| *A. gallagheri* | 1 | IBECN2817 | M | 32.9 | 13.6 | 8.6 | 5.2 | 3.4 | 3.9 | 2.8 | 2.1 | 4.9 | 5 | 6.3 | 7.6 | 10 | 8 | 0 | M462443- M462444 |
| *A. gallagheri* | 1 | IBECN3739 | M | 37.2 | 15.4 | 9.5 | 6 | 3.8 | 4.4 | 3.3 | 2.5 | 5.3 | 5.5 | 7.8 | 8.3 | 10 | 10 | 1 | M462451- M462452 |
| *A. gallagheri* | 1 | IBECN4179 | M | 33.6 | 13 | 8.5 | 6 | 3.5 | 4 | 2.9 | 2 | 5.1 | 4.8 | 7 | 7.2 | 11 | 11 | 1 | M462461- M462462 |
| *A. gallagheri* | 1 | IBECN5815 | M | 32.7 | 13.1 | 8.5 | 5.2 | 3.1 | 3.7 | 2.7 | 2.2 | 4.7 | 4.4 | 6.4 | 6.6 | 11 | 10 | 1 | M462465- M462466 |
| *A. gallagheri* | 1 | IBECN5817 | M | 32.7 | 13.6 | 8.6 | 5.4 | 3.2 | 3.7 | 2.6 | 2.1 | 4.9 | 4.9 | 6.1 | 6.3 | 12 | 8 | 1 | M462467- M462468 |
| *A. gallagheri* | 1 | IBECN89 | M | 31.4 | 12.8 | 8.2 | 5.3 | 3.1 | 3.7 | 2.6 | 2.1 | 4.5 | 5 | 6.7 | 6.9 | 12 | 9 | 1 | M462421-M462422 |
| *A. gallagheri* | 1 | IBES7662 | M | 32 | 12.7 | 8.8 | 5.7 | 3.7 | 3.8 | 2.9 | 2.3 | 4.7 | 4.3 | 6.1 | 6 | 12 | 10 | 1 | M462483- M462484 |
| *A. gallagheri* | 2 | IBECN14 | M | 31.4 | 11.5 | 8.3 | 5.2 | 3.4 | 3.7 | 2.5 | 2 | 4.7 | 4.2 | 6.4 | 6.3 | 10 | 10 | 1 | M462340- M462341 |
| *A. gallagheri* | 1 | IBECN2613 | F | 37.3 | 15.3 | 9.1 | 5.7 | 3.7 | 4.1 | 3.1 | 2.2 | 5.2 | 5.5 | 7.4 | 8.1 | 11 | 9 | 1 | M462435- M462436 |
| *A. gallagheri* | 1 | IBECN204 | F | 36 | 15.4 | 8.8 | 5.7 | 3.3 | 3.7 | 2.9 | 2.1 | 4.9 | 5.1 | 6.5 | 7.7 | 13 | 11 | 1 | M462425- M462426 |
| *A. gallagheri* | 1 | IBECN217 | F | 36.2 | 15.9 | 9.2 | 5.9 | 3.6 | 4.1 | 3 | 2.4 | 5.1 | 5.2 | 6.9 | 7.7 | 12 | 10 | 0 | M462427- M462428 |
| *A. gallagheri* | 1 | IBECN2800 | F | 28.3 | 11.2 | 8 | 4.8 | 2.9 | 3.6 | 2.7 | 1.9 | 4.1 | 4.4 | 5.4 | 6.1 | 11 | 10 | 1 | M462439- M462440 |
| *A. gallagheri* | 1 | IBECN3484 | F | 32.7 | 14.3 | 8.6 | 5.3 | 3.2 | 3.8 | 2.6 | 2.3 | 4.9 | 4.9 | 6.6 | 7.2 | 13 | 10 | 1 | M462445- M462446 |
| *A. gallagheri* | 1 | IBECN4011 | F | 34.9 | 13 | 9.2 | 5.9 | 3.3 | 4.2 | 2.7 | 2.4 | 5.3 | 4.8 | 6.5 | 7.9 | 12 | 9 | 1 | M462453- M462454 |
| *A. gallagheri* | 1 | IBECN4024 | F | 34.2 | 13.7 | 8.9 | 5.7 | 3.5 | 4 | 2.9 | 2.2 | 5.5 | 5.5 | 6.5 | 7 | 12 | 10 | 0 | M462457- M462458 |
| *A. gallagheri* | 1 | IBECN4167 | F | 30.9 | 12.7 | 8.4 | 5.4 | 3.1 | 3.8 | 2.8 | 2 | 4.8 | 4.3 | 6 | 6.8 | 12 | 11 | 1 | M462459- M462460 |
| *A. gallagheri* | 1 | IBECN4313 | F | 33.8 | 12.5 | 8.8 | 5.6 | 3.5 | 4.1 | 2.8 | 2 | 5.1 | 4.2 | 6.4 | 7 | 12 | 10 | 1 | M462463- M462464 |
| *A. gallagheri* | 1 | IBECN7074 | F | 33.7 | 14.3 | 8.6 | 5.7 | 3.2 | 3.5 | 2.6 | 2.1 | 4.8 | 4.6 | 6.1 | 6.2 | 12 | 9 | 0 | M462471- M462472 |
| *A. gallagheri* | 1 | IBECN7945 | F | 33.2 | 14.5 | 8.4 | 5.7 | 2.9 | 3.9 | 2.6 | 2 | 4.9 | 4.8 | 6.4 | 6.7 | 11 | 8 | 1 | M462473- M462474 |
| *A. gallagheri* | 1 | IBECN8040 | F | 29.7 | 11.7 | 7.9 | 4.8 | 3.1 | 3.6 | 2.2 | 1.8 | 4.7 | 4.5 | 5.5 | 6.5 | 11 | 9 | 0 | M462477- M462478 |
| *A. gallagheri* | 1 | IBECN8294 | F | 32 | 12.5 | 8.2 | 4.9 | 3.3 | 3.9 | 2.5 | 1.8 | 4.6 | 4.7 | 6.1 | 6.3 | 12 | 9 | 1 | M462479- M462480 |
| *A. gallagheri* | 1 | IBECN96 | F | 35.5 | 14.4 | 8.9 | 5.9 | 3.3 | 3.8 | 2.9 | 2.2 | 4.8 | 5.4 | 6.5 | 7 | 12 | 10 | 1 | M462348- M462349 |
| *A. gallagheri* | 1 | IBECN3524 | F | 35.5 | 14.3 | 9.1 | 5.6 | 3.4 | 4.2 | 2.8 | 2.3 | 5.3 | 5.1 | 7.5 | 7.5 | 13 | 10 | 1 | M462447- M462448 |
| *A. gallagheri* | 1 | IBECN3728 | F | 33.9 | 14.1 | 8.9 | 5.5 | 3.4 | 4 | 2.5 | 2.2 | 4.6 | 4.1 | 6.6 | 6.7 | 11 | 9 | 0 | M462449- M462450 |
| *A. gallagheri* | 1 | IBECN7106 | F | 26.5 | 9.8 | 7.3 | 4.9 | 2.8 | 3.4 | 2.2 | 1.8 | 3.7 | 3.6 | 5.3 | 5.5 | 12 | 9 | 0 | M462352- M462353 |
| *A. gallagheri* | 1 | IBECN8036 | F | 29 | 11.7 | 7.9 | 5 | 2.9 | 3.2 | 2.5 | 2 | 4.2 | 4.1 | 5.3 | 6.2 | 11 | 9 | 1 | M462475- M462476 |
| *A. gallagheri* | 1 | IBECN5844 | F | 27.2 | 11.9 | 6.9 | 4.4 | 2.6 | 3.1 | 2.1 | 1.6 | 4 | 3.6 | 4.8 | 5 | 13 | 10 | 1 | M462469- M462470 |
| *A. gallagheri* | 1 | TW1037 | F | 30.9 | 13 | 8 | 5.7 | 3.2 | 3.7 | 2.7 | 2.1 | 4.4 | 4.5 | 5.8 | 6.5 | 11 | 9 | 0 | M462501- M462502 |
| *A. gallagheri* | 1 | TW1038 | F | 37.3 | 15.5 | 9.4 | 6.1 | 3.6 | 4.2 | 3.2 | 2.4 | 5.2 | 5.6 | 6.9 | 8.2 | 11 | 10 | 1 | M462503- M462504 |
| *A. gallagheri* | 1 | TW1039 | F | 36.2 | 16.8 | 9 | 6.1 | 3.6 | 4.1 | 3.1 | 2.2 | 5.2 | 5.5 | 6.3 | 7.7 | 11 | 8 | 1 | M462505- M462506 |
| *A. gallagheri* | 1 | TW1026 | F | 33.9 | 14.3 | 8.6 | 5.8 | 3.3 | 3.9 | 2.8 | 2.2 | 4.7 | 4.9 | 6.3 | 7.3 | 11 | 8 | 1 | M462497- M462498 |
| *A. gallagheri* | 1 | TW1027 | F | 32.3 | 13.1 | 8.2 | 5.3 | 3.1 | 3.5 | 2.4 | 2.2 | 4.9 | 4.7 | 6.1 | 6.5 | 10 | 10 | 0 | M462499- M462500 |
| *A. gallagheri* | 2 | IBES6034 | F | 34.5 | 13.1 | 9.7 | 6.1 | 3.4 | 4.4 | 2.9 | 2.4 | 5.4 | 4.5 | 7.1 | 7.2 | 11 | 10 | 1 | M462346- M462347 |
| *A. gallagheri* | 2 | IBECN2593 | F | 33.4 | 13.4 | 8.7 | 5.3 | 3.5 | 4 | 2.5 | 2.1 | 4.9 | 4.3 | 6.9 | 6.7 | 12 | 9 | 1 | M462344- M462345 |
|  |  | **Summary Statistics (Total)** |  |  |  |  |  |  |  |  |  |  |  |  |  |  |  |  |  |
|  |  | Mean |  | 33.2 | 13.5 | 8.6 | 5.5 | 3.3 | 3.9 | 2.8 | 2.1 | 4.9 | 4.8 | 6.5 | 6.9 | 11.5 | 9.4 |  |  |
|  |  | Standard Deviation |  | 2.7 | 1.5 | 0.6 | 0.4 | 0.3 | 0.3 | 0.3 | 0.2 | 0.4 | 0.6 | 0.7 | 0.8 | 0.8 | 0.8 |  |  |
|  |  | Minimum |  | 26.5 | 9.8 | 6.9 | 4.4 | 2.6 | 3.1 | 2.1 | 1.6 | 3.7 | 3.6 | 4.8 | 5 | 10 | 8 |  |  |
|  |  | Maximum |  | 37.3 | 16.8 | 9.7 | 6.2 | 3.8 | 4.4 | 3.3 | 2.5 | 5.6 | 6 | 7.8 | 8.5 | 13 | 11 |  |  |
