# Supplementary material
Source: publisher figshare collection journal article supplement (https://tandf.figshare.com/articles/dataset/_/5705203)
Supplement: Supplementary file 3 [file 1 › tsab_a_1403496_sm2343.docx]

**Table S5.** **PCA loadings for each morphological (1) and environmental (2) variables.** The variance and cumulative variance explained in each component are also shown.

**1)**

|  | PC1 | PC2 | PC3 |
| --- | --- | --- | --- |
| **TrL** | 0.942 | -0.202 | -0.244 |
| **HL** | -0.13 | -0.043 | -0.424 |
| **HW** | -0.026 | -0.007 | -0.278 |
| **HH** | -0.075 | -0.039 | -0.141 |
| **SL** | -0.102 | -0.072 | -0.233 |
| **SW** | -0.045 | -0.123 | -0.034 |
| **ED** | 0.008 | -0.006 | -0.206 |
| **LUn** | -0.125 | -0.043 | -0.21 |
| **LHu** | -0.033 | -0.582 | 0.227 |
| **LTb** | -0.198 | -0.178 | -0.674 |
| **LFe** | -0.146 | -0.75 | 0.125 |
| **Variance** | 0.518 | 0.211 | 0.113 |
| **Cumulative** | 48% | 68% | 79% |

**2)**

|  | PC1 | PC2 | PC3 |
| --- | --- | --- | --- |
| **aridity** | 0.236 | 0.005 | -0.094 |
| **bio1** | -0.235 | -0.011 | -0.175 |
| **bio2** | -0.082 | 0.314 | 0.228 |
| **bio3** | -0.166 | 0.12 | 0.267 |
| **bio4** | 0.115 | 0.27 | -0.172 |
| **bio5** | -0.221 | 0.128 | -0.092 |
| **bio6** | -0.202 | -0.176 | -0.176 |
| **bio7** | 0.02 | 0.343 | 0.119 |
| **bio8** | -0.196 | -0.149 | 0.167 |
| **bio9** | -0.173 | 0.206 | -0.208 |
| **bio10** | -0.221 | 0.06 | -0.259 |
| **bio11** | -0.233 | -0.078 | -0.109 |
| **bio12** | 0.234 | 0.048 | -0.135 |
| **bio13** | 0.166 | 0.249 | -0.001 |
| **bio14** | 0.194 | -0.077 | 0.075 |
| **bio15** | -0.113 | 0.293 | 0.086 |
| **bio16** | 0.21 | 0.142 | -0.188 |
| **bio17** | 0.216 | -0.094 | 0.215 |
| **bio18** | 0.21 | -0.101 | 0.17 |
| **bio19** | 0.154 | 0.175 | -0.382 |
| **ndvimax** | 0.097 | 0.096 | -0.312 |
| **pet** | -0.191 | 0.209 | 0.119 |
| **Variance** | 16.823 | 7.786 | 1.807 |
| **Cumulative** | 58% | 85% | 91% |
